## Erratum

**Liu, J., Chau, C.-H., Liu, H., Jang, B. R., Li, X., Chan, Y.-S. and Shum, D. K. Y.** (2006). Upregulation of chondroitin 6-sulphotransferase-1 facilitates Schwann cell migration during axonal growth. *J. Cell Sci.* **119**, 933-942.

We apologise for an error in the first name of Y.-S. Chan, which should be Ying-Shing not Ying-Shang.

The error appeared in both the print and online versions of this article.
